# Supplementary material
Source: PubMed Central journal article supplement (PMC6029885)
Supplement: NIHMS928440-supplement-1.pdf [file NIHMS928440-supplement-1.pdf]

### **Supplementary Figure 1**

STING and cGAS mutations in human tumors. (a) Alteration frequency for *STING* or *cGAS* gene in human tumors. The data were obtained from cBioPortal. (b) *STING* or *cGAS* mutations found in human tumors. The data were obtained from cBioPortal. The mutants tested in this study are colored in red. SNP data were obtained from dbSNP, 1000 Genomes Project, and ExAC databases. (c) *STING* or *cGAS* mutations found in human tumors. The data were obtained from cBioPortal, COSMIC, and ICGC databases. (d) Allele frequency of *STING* or *cGAS* mutants. The data obtained from ExAC. (e) *STING*/*cGAS* expression profiles in a variety of cancer cell lines compared to normal counterparts.

### **Supplementary Figure 2**

STING crystal structure. Human STING dimer in complex with cGAMP (PDB ID: 4LOH). R169 and P203 are highlighted in red.

### **Supplementary Figure 3**

STING mutants are dominant-negative mutants. (a) As described in Figure 2a, the luciferase activity in the cell lysates was measured after the transfection of the indicated plasmids. The numbers under the graph indicate the amount of transfected plasmids ( $\mu\text{g}$ ). (b) As described in Figure 4b, the reconstituted MEF cells were treated with dsDNA and then western blots were performed with the indicated antibodies.

### **Supplementary Figure 4**

Pair-wise correlation matrix for methylation probes. (a and b) The correlations for the 16 cGAS probes are shown in a and the 11 probes for STING in b. The Pearson correlation was calculated across 9173 samples.

### **Supplementary Figure 5**

Tumor Purity vs. methylation levels for cGAS and STING. The tumor purity was used to establish that the methylation signal for cGAS and STING comes from tumor cells and not from

infiltrating immune cells. The figures show that the methylation is muted due to infiltrating cells. Only pure tumor samples (CPE TP = 1) show a full range in methylation levels.

### **Supplementary Figure 6**

cGAS and STING promoters are highly methylated in a variety of human tumors. The methylation data were obtained from MethHC database that collects methylation data focusing on human tumors from TCGA. MethHC database provides dataset of methylation for 18 different human tumors and uses  $\beta$ -value to measure the methylation level. The  $\beta$ -value for *cGAS* (*MB21D1*), *STING* (*TMEM173*), *RIG-I* (*DDX58*), *MDA5* (*IFIH1*), *MAVS*, or *TBK1* gene in human tumors (T) was statistically analyzed compared to normal tissues (N) and is shown in box plots that were made by using BoxPlotR. The  $\beta$ -value used in this figure indicates the methylation level for promoter region including TSS1500, TSS200, and 5'UTR. The statistical analysis was performed by Student's *t*-test. \* and \*\* indicate  $p < 0.05$  and  $p < 0.005$ , respectively. Abbreviation for each tumor type is shown in Supplementary Information.

# Supplementary Figure 1

|   | STING                          | cGAS  |       | STING                            | cGAS  |       |
|---|--------------------------------|-------|-------|----------------------------------|-------|-------|
| a | ACbC (MSKCC/Breast 2015)       | 0%    | 0%    | MBL (Broad)                      | 0%    | 0%    |
|   | ACC (TCGA)                     | 0%    | 0%    | MBL (ICGC)                       | 0%    | 0%    |
|   | ACyC (FMI 2014)                | 0%    | 0%    | MBL (PCGP)                       | 0%    | 0%    |
|   | ACyC (MDA 2015)                | 0%    | 0%    | MCL (IDIBIPS 2013)               | 0%    | 0%    |
|   | ACyC (MSKCC, 2013)             | 0%    | 0%    | MDS (Tokyo)                      | 0%    | 0%    |
|   | ACyC (Sanger 2013)             | 0%    | 0%    | Melanoma (Broad)                 | 1.70% | 1.70% |
|   | ALL (St. Jude)                 | 0%    | 0%    | Melanoma (Broad/DFCI)            | 0%    | 0%    |
|   | AML (TCGA)                     | 0%    | 0%    | Melanoma (TCGA)                  | 0.80% | 1.40% |
|   | Bladder (BGI 2013)             | 1%    | 1%    | Melanoma (Yale)                  | 0%    | 1.10% |
|   | Bladder (DFCI/MSKCC 2014)      | 2%    | 2%    | MM (Broad)                       | 0%    | 0.50% |
|   | Bladder (MSKCC 2012)           | 0%    | 0%    | MPNST (MSKCC)                    | 0%    | 0%    |
|   | Bladder (MSKCC 2014)           | 0%    | 0%    | NBL (AMC)                        | 0%    | 0%    |
|   | Bladder (TCGA)                 | 0%    | 1.50% | NBL (Cologne 2015)               | 0%    | 0%    |
|   | Bladder PV (MSKCC)             | 0%    | 0%    | nccRCC (Genentech 2014)          | 0%    | 0%    |
|   | Breast (BCCRC 2012)            | 0%    | 0%    | NCI-60                           | 1.70% | 1.70% |
|   | Breast (BCCRC Xenograft)       | 0%    | 0%    | NEPC (Trento/Cornell/Broad 2016) | 0%    | 0%    |
|   | Breast (Broad 2012)            | 0%    | 0%    | NPC (Singapore)                  | 0%    | 0%    |
|   | Breast (METABRIC)              | 0%    | 0%    | NSCLC (TCGA 2016)                | 0.70% | 0.30% |
|   | Breast (Sanger)                | 0%    | 0%    | Ovarian (TCGA)                   | 0%    | 0%    |
|   | Breast (TCGA)                  | 0.10% | 0.10% | Ovary SC (MSKCC)                 | 0%    | 0%    |
|   | CCLE (Novartis/Broad 2012)     | 0%    | 0%    | PAAC (JHU)                       | 0%    | 0%    |
|   | ccRCC (BGI 2012)               | 0%    | 0%    | Pancreas (ICGC)                  | 0%    | 0%    |
|   | ccRCC (IRC)                    | 0%    | 0%    | Pancreas (QCMG 2016)             | 0%    | 0%    |
|   | ccRCC (TCGA)                   | 0%    | 0%    | Pancreas (TCGA)                  | 0.70% | 0%    |
|   | ccRCC (U Tokyo)                | 0%    | 0%    | Pancreas (UTSW)                  | 0%    | 0%    |
|   | Cervical (TCGA)                | 0%    | 1%    | Panet (Shanghai 2013)            | 0%    | 0%    |
|   | Cholangiocarcinoma (JHU)       | 0%    | 0%    | PANET (Johns Hopkins 2011)       | 0%    | 0%    |
|   | Cholangiocarcinoma (NCCS)      | 0%    | 0%    | PCNSL (Mayo Clinic)              | 10%   | 10%   |
|   | Cholangiocarcinoma (NUS)       | 0%    | 0%    | PCPG (TCGA)                      | 0%    | 0%    |
|   | Cholangiocarcinoma (TCGA)      | 0%    | 0%    | PLMESO (NYU 2015)                | 0%    | 0%    |
|   | chRCC (TCGA)                   | 0%    | 0%    | PRAD Hallmarks (CPCG-GENE, 2017) | 0%    | 0%    |
|   | CLL (Broad 2013)               | 0%    | 0%    | pRCC (TCGA)                      | 0.70% | 0.40% |
|   | CLL (IUOPA 2015)               | 0%    | 0%    | Prostate (Broad/Cornell 2012)    | 0%    | 0%    |
|   | Colorectal (DFCI 2016)         | 1.10% | 1.10% | Prostate (Broad/Cornell 2013)    | 0%    | 0%    |
|   | Colorectal (Genentech)         | 1.40% | 4.20% | Prostate (FHCRC, 2016)           | 0%    | 0%    |
|   | Colorectal (MSKCC)             | 0%    | 0%    | Prostate (MICH)                  | 0%    | 0%    |
|   | Colorectal (TCGA)              | 0%    | 1.80% | Prostate (MSKCC 2010)            | 0%    | 0%    |
|   | CSCC (DFCI 2015)               | 0%    | 0%    | Prostate (SU2C)                  | 0%    | 0%    |
|   | CTCL (Columbia 2015)           | 0%    | 0%    | Prostate (TCGA)                  | 0.40% | 0%    |
|   | DESM (Broad 2015)              | 0%    | 0%    | Prostate Organoids               | 0%    | 0%    |
|   | DLBC (TCGA)                    | 0%    | 0%    | Renal unclass (MSKCC)            | 0%    | 0%    |
|   | DLBCL (Broad 2012)             | 0%    | 1.70% | RMS (NIH)                        | 0%    | 0%    |
|   | ESCC (UCLA 2014)               | 0%    | 0%    | Sarcoma (MSKCC)                  | 0%    | 0%    |
|   | Esophagus (Broad)              | 0%    | 0.70% | Sarcoma (TCGA)                   | 0%    | 0%    |
|   | Esophagus (TCGA)               | 0.50% | 0%    | Small Cell Lung (CLCGP)          | 0%    | 0%    |
|   | Esophagus sq (ICGC)            | 0%    | 1.10% | Small Cell Lung (JHU)            | 0%    | 2.40% |
|   | Ewing Sarcoma (DFCI)           | 0%    | 0%    | Small Cell Lung (UCOLOGNE)       | 0%    | 0.90% |
|   | Ewing Sarcoma (Institut Curie) | 0%    | 0%    | Stomach (Pfizer UHK)             | 1%    | 0%    |
|   | GBC (Shanghai)                 | 0%    | 3.10% | Stomach (TCGA)                   | 0.50% | 2%    |
|   | GBM (TCGA)                     | 0%    | 0%    | Stomach (TMUCIH 2015)            | 1.30% | 1.30% |
|   | Glioma (TCGA)                  | 0%    | 0.30% | Stomach (UHK)                    | 0%    | 0%    |
|   | Glioma (UCSF)                  | 1.60% | 0%    | Stomach (UTokyo)                 | 0%    | 0%    |
|   | Head & neck (Broad)            | 0%    | 0%    | Testicular germ cell (TCGA)      | 0%    | 0%    |
|   | Head & neck (JHU)              | 3.10% | 0%    | TET (NCI)                        | 0%    | 0%    |
|   | Head & neck (MDA)              | 2.50% | 0%    | Thymoma (TCGA)                   | 0%    | 0%    |
|   | Head & neck (TCGA)             | 0.40% | 0.40% | Thyroid (MSKCC 2016)             | 0%    | 0%    |
|   | hnc_mskcc_2016                 | 0%    | 0%    | Thyroid (TCGA)                   | 0%    | 0%    |
|   | LGG-GBM (TCGA 2016)            | 0%    | 0.10% | ucs (Johns Hopkins 2014)         | 0%    | 0%    |
|   | Liad (Inserm 2014)             | 0%    | 0%    | Uterine (TCGA)                   | 1.60% | 0.80% |
|   | Liver (AMC)                    | 0.40% | 0.40% | Uterine CS (TCGA)                | 1.80% | 0%    |
|   | Liver (RIKEN)                  | 0%    | 0%    | Uveal melanoma (TCGA)            | 0%    | 1.30% |
|   | Liver (TCGA)                   | 1.10% | 0.80% |                                  |       |       |
|   | Lung adeno (Broad)             | 0%    | 0%    |                                  |       |       |
|   | Lung adeno (MSKCC)             | 0%    | 0%    |                                  |       |       |
|   | Lung adeno (TCGA)              | 0.90% | 0.40% |                                  |       |       |
|   | Lung adeno (TSP)               | 0%    | 0%    |                                  |       |       |
|   | Lung squ (TCGA)                | 1.10% | 0%    |                                  |       |       |

# Supplementary Figure 1

b

## STING (TMEM173)

\*1

\*2

\*3

\*4

| Sample ID               | Cancer Study              | AA change   | Type          | Copy #     | Allele Freq (T) | Count | Total Count | dbSNP                                        | 1000 Genomes        | ExAC            |
|-------------------------|---------------------------|-------------|---------------|------------|-----------------|-------|-------------|----------------------------------------------|---------------------|-----------------|
| TCGA-73-4675-01         | Lung adeno (TCGA pub)     | S4C         | Missense      | Gain       | 0.26            |       |             |                                              |                     |                 |
| TCGA-73-4675-01         | Lung adeno (TCGA)         | S4C         | Missense      | Gain       | 0.26            | 1     | 1           | N                                            |                     | N               |
| TCGA-73-4675-01         | NSCLC (TCGA 2016)         | S4C         | Missense      | Gain       | 0.26            |       |             |                                              |                     |                 |
| TCGA-YJ-A8SW-01         | Prostate (TCGA)           | L49I        | Missense      | Gain       | 0.56            | 1     | 1           | N                                            |                     | N               |
| B105-0                  | Bladder (BGI 2013)        | H50Q        | Missense      | NA         | NA              | 1     | 1           | N                                            |                     | N               |
| TCGA-BH-A0BF-01         | Breast (TCGA pub)         | R71H        | Missense      | ShallowDel | NA              | 1     | 1           | Y                                            | R: 0.7969/H: 0.2031 | Y (0.1834)      |
| TCGA-CZ-5464-01         | ccRCC (TCGA pub)          | H74Y        | Missense      | AMP        | NA              | 1     | 1           | Y (H: 0.99998355/Y: 0.00001647) ss1687970267 |                     | N               |
| coadread_dfc1_2016_4500 | Colorectal (DFCI 2016)    | R78W        | Missense      | NA         | NA              | 1     | 1           | Y (R: 0.99999177/W: 0.00000825) ss1687970252 |                     | Y (0.000009113) |
| TCGA-D3-A51K-06         | Melanoma (TCGA)           | W82R        | Missense      | Gain       | 0.69            | 1     | 1           | N                                            |                     | N               |
| PGM52                   | Stomach (TMUCIH 2015)     | T84S        | Missense      | NA         | NA              | 1     | 1           | N                                            |                     | N               |
| coadread_dfc1_2016_3152 | Colorectal (DFCI 2016)    | V85Cfs*46   | FS del        | NA         | NA              | 1     | 1           | N                                            |                     | N               |
| TCGA-L9-A8F4-01         | NSCLC (TCGA 2016)         | G90C        | Missense      | Diploid    | 0.39            | 1     | 1           | N                                            |                     | N               |
| coadread_dfc1_2016_229  | Colorectal (DFCI 2016)    | R94C        | Missense      | NA         | NA              | 1     | 1           | Y (R: 0.99999177/C: 0.00000824) ss1687970244 |                     | Y (0.000008590) |
| TCGA-BR-8486-01         | Stomach (TCGA)            | G96E        | Missense      | Diploid    | NA              | 1     | 1           | N                                            |                     | N               |
| TCGA-63-A5MB-01         | NSCLC (TCGA 2016)         | V113L       | Missense      | ShallowDel | 0.6             | 1     | 1           | N                                            |                     | N               |
| TCGA-N7-A4Y8-01         | Uterine CS (TCGA)         | S127T       | Missense      | ShallowDel | 0.46            | 1     | 1           | N                                            |                     | N               |
| TCGA-18-3409-01         | Lung squ (TCGA pub)       | L133F       | Missense      | Diploid    | 0.26            |       |             |                                              |                     |                 |
| TCGA-18-3409-01         | Lung squ (TCGA)           | L133F       | Missense      | ShallowDel | 0.26            | 1     | 1           | N                                            |                     | N               |
| TCGA-18-3409-01         | NSCLC (TCGA 2016)         | L133F       | Missense      | ShallowDel | 0.26            |       |             |                                              |                     |                 |
|                         | Head & neck (JHU)         | L136P       | Missense      | NA         | NA              | 1     |             |                                              |                     |                 |
| OSCM-PT10-325-T         | Head & neck (MDA)         | L136P       | Missense      | NA         | NA              | 1     | 2           | N                                            |                     | N               |
| TCGA-IB-7651-01         | Pancreas (TCGA)           | W161*       | Nonsense      | Diploid    | 0.19            | 1     | 1           | N                                            |                     | N               |
| TCGA-58-8387-01         | NSCLC (TCGA 2016)         | R169W       | Missense      | ShallowDel | 0.11            | 1     |             |                                              |                     |                 |
| TCGA-IB-7651-01         | Pancreas (TCGA)           | R169W       | Missense      | Diploid    | 0.2             |       | 3           | Y (No frequency data)                        |                     | N               |
| PCNSL_4                 | PCNSL (Mayo Clinic)       | R169W       | Missense      | NA         | NA              | 1     |             |                                              |                     |                 |
| coadread_dfc1_2016_593  | Colorectal (DFCI 2016)    | R180Q       | Missense      | NA         | NA              | 1     |             |                                              |                     |                 |
| coadread_dfc1_2016_3235 | Colorectal (DFCI 2016)    | R180Q       | Missense      | NA         | NA              | 1     |             |                                              |                     |                 |
| TCGA-D1-A16X-01         | Uterine (TCGA pub)        | R180Q       | Missense      | Diploid    | 0.19            | 1     |             |                                              |                     |                 |
| TCGA-D1-A16X-01         | Uterine (TCGA)            | R180Q       | Missense      | Diploid    | 0.19            |       | 3           | N                                            |                     | N               |
| ME017                   | Melanoma (Broad)          | R191L       | Missense      | NA         | NA              | 1     | 1           | N                                            |                     | N               |
| TCGA-L5-A43J-01         | Esophagus (TCGA)          | R191Q       | Missense      | Diploid    | NA              | 1     | 1           | Y (R: 0.99998355/Q: 0.00001647) ss1687970161 |                     | Y (0.00001647)  |
| coadread_dfc1_2016_3209 | Colorectal (DFCI 2016)    | R191W       | Missense      | NA         | NA              | 1     | 1           | Y (R: 0.99961287/W: 0.00038711) ss1687970162 |                     | Y (0.00038711)  |
| TCGA-B5-A11E-01         | Uterine (TCGA pub)        | R197Q       | Missense      | Diploid    | 0.38            | 1     | 1           | Y (R: 0.99996704/Q: 0.00003295) ss1687970156 |                     | Y (0.00003295)  |
| TCGA-B5-A11E-01         | Uterine (TCGA)            | R197Q       | Missense      | Diploid    | 0.38            |       |             |                                              |                     |                 |
| TCGA-EE-A3AA-06         | Melanoma (TCGA)           | L202F       | Missense      | Gain       | 0.09            | 1     | 1           | N                                            |                     | N               |
| TCGA-D6-6516-01         | Head & neck (TCGA pub)    | P203S       | Missense      | Diploid    | 0.14            | 1     |             |                                              |                     |                 |
| TCGA-D6-6516-01         | Head & neck (TCGA)        | P203S       | Missense      | Diploid    | 0.14            |       | 2           | N                                            |                     | N               |
| MEL-Ma-Mel-65           | Melanoma (Broad)          | P203S       | Missense      | NA         | NA              | 1     |             |                                              |                     |                 |
| TCGA-AN-A0AK-01         | Breast (TCGA 2015)        | D210N       | Missense      | ShallowDel | 0.53            |       |             |                                              |                     |                 |
| TCGA-AN-A0AK-01         | Breast (TCGA)             | D210N       | Missense      | ShallowDel | NA              | 1     | 1           | N                                            |                     | N               |
| TCGA-DD-A3A0-01         | Liver (TCGA)              | N218Tfs*129 | FS del        | Diploid    | 0.28            | 1     | 1           | N                                            |                     | N               |
| HCT_15                  | NCI-60                    | A233S       | Missense      | ShallowDel | NA              | 1     | 1           | N                                            |                     | N               |
| MSKCC-0620_R            | Bladder (DFCI/MSKCC 2014) | R238W       | Missense      | NA         | NA              | 1     | 1           | N                                            |                     | N               |
| TCGA-MG-AAMC-01         | Prostate (TCGA)           | R253W       | Missense      | Diploid    | 0.44            | 1     | 1           | Y                                            | R: 0.9998/W: 0.002  | Y (0.0001006)   |
| TCGA-18-3406-01         | Lung squ (TCGA pub)       | A254A       | splice region | Diploid    | 0.09            | 1     | 1           | Y                                            |                     | N               |
| P01_Rec                 | Glioma (UCSF)             | T263I       | Missense      | NA         | 0.11            | 1     | 1           | N                                            |                     | N               |
| coadread_dfc1_2016_390  | Colorectal (DFCI 2016)    | L265Cfs*82  | FS del        | NA         | NA              | 1     |             |                                              |                     |                 |
| TCGA-BR-8487-01         | Stomach (TCGA pub)        | L265Cfs*82  | FS del        | Diploid    | 0.43            |       | 2           | N                                            |                     | N               |
| TCGA-BR-8487-01         | Stomach (TCGA)            | L265Cfs*82  | FS del        | Diploid    | NA              | 1     |             |                                              |                     |                 |
| H071591                 | Liver (AMC)               | M271V       | Missense      | Diploid    | 0.18            | 1     | 1           | N                                            |                     | N               |
| TCGA-DD-AAD8-01         | Liver (TCGA)              | Y274C       | Missense      | ShallowDel | 0.25            | 1     | 1           | N                                            |                     | N               |
| TCGA-AP-AOLF-01         | Uterine (TCGA pub)        | Q276P       | Missense      | Diploid    | 0.18            |       |             |                                              |                     |                 |
| TCGA-AP-AOLF-01         | Uterine (TCGA)            | Q276P       | Missense      | Diploid    | 0.18            | 1     | 1           | N                                            |                     | N               |
| TCGA-46-3768-01         | Lung squ (TCGA pub)       | R281L       | Missense      | ShallowDel | 0.07            | 1     | 1           | N                                            |                     | N               |
| TCGA-37-4141-01         | Lung squ (TCGA pub)       | E282*       | Nonsense      | Diploid    | 0.68            |       |             |                                              |                     |                 |
| TCGA-37-4141-01         | Lung squ (TCGA)           | E282*       | Nonsense      | Gain       | 0.68            | 1     | 1           | N                                            |                     | N               |
| TCGA-37-4141-01         | NSCLC (TCGA 2016)         | E282*       | Nonsense      | Gain       | 0.68            |       |             |                                              |                     |                 |
| TCGA-55-7815-01         | Lung adeno (TCGA pub)     | R284M       | Missense      | Diploid    | 0.22            |       |             |                                              |                     |                 |
| TCGA-55-7815-01         | Lung adeno (TCGA)         | R284M       | Missense      | Diploid    | 0.22            | 1     | 1           | N                                            |                     | N               |
| TCGA-55-7815-01         | NSCLC (TCGA 2016)         | R284M       | Missense      | Diploid    | 0.22            |       |             |                                              |                     |                 |
| TCGA-60-2725-01         | NSCLC (TCGA 2016)         | P303Lfs*44  | FS del        | ShallowDel | 0.08            | 1     | 1           | N                                            |                     | N               |
| 587376                  | Colorectal (Genentech)    | R310H       | Missense      | NA         | NA              | 1     | 1           | Y (R: 0.99993414/H: 0.00006589) ss1687970089 |                     | Y (0.00006740)  |
| TCGA-CV-7410-01         | Head & neck (TCGA)        | A318T       | Missense      | Diploid    | NA              | 1     | 1           | N                                            |                     | N               |
| TCGA-Y8-ABRY-01         | pRCC (TCGA)               | D319E       | Missense      | Diploid    | 0.2             | 1     | 1           | N                                            |                     | N               |
| TCGA-FV-A3R2-01         | Liver (TCGA)              | V329F       | Missense      | Gain       | 0.19            | 1     | 1           | Y (V: 0.99999177/F: 0.00000824) ss1687970061 |                     | Y (0.000008304) |
| pf127T                  | Stomach (Pfizer UHK)      | T356M       | Missense      | NA         | 0.34            | 1     | 1           | Y (T: 0.99999177/M: 0.00000824) ss1687970048 |                     | Y (0.000009704) |
| TCGA-FW-A3R5-06         | Melanoma (TCGA)           | P371L       | Missense      | Diploid    | 0.33            | 1     | 1           | N                                            |                     | N               |
| TCGA-D1-A16F-01         | Uterine (TCGA pub)        | R375C       | Missense      | NA         | 0.24            |       |             |                                              |                     |                 |
| TCGA-D1-A16F-01         | Uterine (TCGA)            | R375C       | Missense      | NA         | 0.24            | 1     | 1           | Y (R: 0.99994224/C: 0.00005775) ss1687970037 |                     | Y (0.0001269)   |
| TCGA-B1-A856-01         | pRCC (TCGA)               | R375H       | Missense      | Gain       | 0.42            | 1     | 1           | Y                                            | R: 0.9970/H: 0.0030 | Y (0.0001064)   |
| TCGA-BC-A10R-01         | Liver (TCGA)              | T376K       | Missense      | ShallowDel | 0.46            | 1     | 1           | Y (No frequency data)                        |                     | N               |

\*1

ShallowDel: possibly heterozygous deletion  
Gain: Amplification  
NA: Not available

\*2

Y: Yes (Data exists in dbSNP)  
N: No (No data exists in dbSNP)  
Number means allele frequency.  
ss means submitted SNP number.

\*3

Number means allele frequency.

\*4

Y: Yes (Data exists in ExAC)  
N: No (No data exists in ExAC)  
Number means allele frequency.

# Supplementary Figure 1

b (Continued)

cGAS (MB21D1)

| Sample ID                  | Cancer Study               | AA change   | Type     | Copy #     | Allele Freq (T) | Count | Total Count | dbSNP                                        | 1000 Genomes        | ExAC           |
|----------------------------|----------------------------|-------------|----------|------------|-----------------|-------|-------------|----------------------------------------------|---------------------|----------------|
| TCGA-DD-A113-01            | Liver (TCGA)               | G6R         | Missense | Diploid    | 0.23            | 1     | 1           |                                              |                     | N              |
| XHDG38                     | GBC (Shanghai)             | G16R        | Missense | NA         | NA              | 1     | 1           |                                              |                     | N              |
| 587350                     | Colorectal (Genentech)     | M32I        | Missense | NA         | NA              | 1     | 1           |                                              |                     | N              |
| TCGA-DD-A3A0-01            | Liver (TCGA)               | A54Pfs*119  | FS del   | Diploid    | 0.07            | 1     | 1           |                                              |                     | N              |
| PCNSL_5                    | PCNSL (Mayo Clinic)        | K82T        | Missense | NA         | NA              | 1     | 1           | Y (K: 0.99998903/T: 0.00001097) ss1688394886 |                     | N              |
| coadread_dfici_2016_2624   | Colorectal (DFCI 2016)     | G145R       | Missense | NA         | NA              | 1     |             |                                              |                     |                |
| TCGA-HU-A4GU-01            | Stomach (TCGA pub)         | G145R       | Missense | Diploid    | 0.2             | 1     | 2           |                                              |                     | N              |
| TCGA-HU-A4GU-01            | Stomach (TCGA)             | G145R       | Missense | Gain       | NA              |       |             |                                              |                     | N              |
| DLBCL_MAYO_DLBC_L_234      | DLBCL (Broad 2012)         | V154I       | Missense | NA         | NA              | 1     | 1           |                                              |                     | N              |
| coadread_dfici_2016_2369   | Colorectal (DFCI 2016)     | A159V       | Missense | NA         | NA              | 1     | 1           |                                              |                     | N              |
| coadread_dfici_2016_1208   | Colorectal (DFCI 2016)     | R166Q       | Missense | NA         | NA              | 1     | 1           | Y (R: 0.99998355/Q: 0.00001648) ss1688394836 |                     | Y (0.00001717) |
| TCGA-DD-A3A7-01            | Liver (TCGA)               | E216D       | Missense | Diploid    | 0.34            | 1     | 1           |                                              |                     | N              |
| TCGA-AA-A010-01            | Colorectal (TCGA pub)      | V234A       | Missense | Diploid    | NA              |       |             |                                              |                     | N              |
| TCGA-AA-A010-01            | Colorectal (TCGA)          | V234A       | Missense | Diploid    | NA              | 1     | 1           |                                              |                     | N              |
| TCGA-90-A4ED-01            | NSCLC (TCGA 2016)          | E241K       | Missense | Diploid    | 0.29            | 1     | 1           |                                              |                     | N              |
| TCGA-ER-A193-06            | Melanoma (TCGA)            | S243T       | Missense | Diploid    | 0.29            | 1     | 1           |                                              |                     | N              |
| MSKCC-0100_R               | Bladder (DFCI/MSKCC 2014)  | R246C       | Missense | NA         | NA              | 1     | 1           | Y (R: 0.99994230/C: 0.00005767) ss1688394779 |                     | Y (0.00005850) |
| TCGA-AP-A056-01            | Uterine (TCGA pub)         | Y248*       | Nonsense | Diploid    | 0.22            | 1     |             |                                              |                     | N              |
| TCGA-AP-A056-01            | Uterine (TCGA)             | Y248*       | Nonsense | Diploid    | 0.22            | 1     | 1           |                                              |                     | N              |
| TCGA-EE-A29E-06            | Melanoma (TCGA)            | P257S       | Missense | Diploid    | 0.54            | 1     |             |                                              |                     | N              |
| TCGA-D3-A3C7-06            | Melanoma (TCGA)            | P257S       | Missense | Diploid    | 0.45            | 1     | 2           |                                              |                     | N              |
| TCGA-B5-A0JY-01            | Uterine (TCGA pub)         | E259*       | Nonsense | Diploid    | 0.33            |       |             |                                              |                     | N              |
| TCGA-B5-A0JY-01            | Uterine (TCGA)             | E259*       | Nonsense | Diploid    | 0.33            | 1     | 1           |                                              |                     | N              |
| MEL-JWCI-WGS-12            | Melanoma (Broad)           | G303E       | Missense | NA         | NA              | 1     | 1           |                                              |                     | N              |
| TCGA-95-7039-01            | Lung adeno (TCGA pub)      | V318L       | Missense | Diploid    | 0.51            |       |             |                                              |                     | N              |
| TCGA-95-7039-01            | Lung adeno (TCGA)          | V318L       | Missense | Diploid    | 0.51            | 1     | 1           |                                              |                     | N              |
| TCGA-95-7039-01            | NSCLC (TCGA 2016)          | V318L       | Missense | Diploid    | 0.51            |       |             |                                              |                     | N              |
| TCGA-FS-A1Z0-06            | Melanoma (TCGA)            | S326L       | Missense | AMP        | 0.63            | 1     | 1           |                                              |                     | N              |
| H080750                    | Liver (AMC)                | W330C       | Missense | Diploid    | 0.3             | 1     | 1           |                                              |                     | N              |
| coadread_dfici_2016_1202   | Colorectal (DFCI 2016)     | W330R       | Missense | NA         | NA              | 1     | 1           |                                              |                     | N              |
| ESQ-007                    | Esophagus (Broad)          | S333I       | Missense | NA         | 0.13            | 1     | 1           |                                              |                     | N              |
| B70                        | Bladder (BGI 2013)         | R339H       | Missense | NA         | NA              | 1     |             |                                              |                     | N              |
| coadread_dfici_2016_345    | Colorectal (DFCI 2016)     | R339H       | Missense | NA         | NA              | 1     |             |                                              |                     | N              |
| PGM21                      | Stomach (TMUICH 2015)      | R339H       | Missense | NA         | NA              | 1     |             |                                              |                     | N              |
| TCGA-BR-4257-01            | Stomach (TCGA pub)         | R339H       | Missense | Gain       | 0.19            | 1     | 5           | Y                                            | R: 0.9998/H: 0.0002 | Y (0.00002472) |
| TCGA-BR-4257-01            | Stomach (TCGA)             | R339H       | Missense | Gain       | NA              |       |             |                                              |                     | N              |
| TCGA-B5-A0JY-01            | Uterine (TCGA pub)         | R339H       | Missense | Diploid    | 0.33            | 1     |             |                                              |                     | N              |
| TCGA-B5-A0JY-01            | Uterine (TCGA)             | R339H       | Missense | Diploid    | 0.33            |       |             |                                              |                     | N              |
| TCGA-AP-A056-01            | Uterine (TCGA pub)         | N342H       | Missense | Diploid    | 0.34            |       |             |                                              |                     | N              |
| TCGA-AP-A056-01            | Uterine (TCGA)             | N342H       | Missense | Diploid    | 0.34            | 1     | 1           |                                              |                     | N              |
| TCGA-DK-A1AC-01            | Bladder (TCGA 2014)        | W343*       | Nonsense | Gain       | 0.35            | 1     | 1           |                                              |                     | N              |
| TCGA-DK-A1AC-01            | Bladder (TCGA)             | W343*       | Nonsense | Gain       | 0.35            |       |             |                                              |                     | N              |
| MM-0509                    | MM (Broad)                 | W343C       | Missense | NA         | NA              | 1     | 1           |                                              |                     | N              |
| TCGA-G2-A2EO-01            | Bladder (TCGA 2014)        | S345*       | Nonsense | ShallowDel | 0.28            | 1     | 1           |                                              |                     | N              |
| TCGA-G2-A2EO-01            | Bladder (TCGA)             | S345*       | Nonsense | ShallowDel | 0.28            |       |             |                                              |                     | N              |
| TCGA-CV-A45W-01            | Head & neck (TCGA)         | S345L       | Missense | Diploid    | 0.09            | 1     | 1           |                                              |                     | N              |
| TCGA-B9-A8Y1-01            | pRCC (TCGA)                | N368H       | Missense | Diploid    | 0.27            | 1     | 1           |                                              |                     | N              |
| TCGA-IN-A7NT-01            | Stomach (TCGA)             | R376L       | Missense | ShallowDel | NA              | 1     | 1           |                                              |                     | N              |
| coadread_dfici_2016_237641 | Colorectal (DFCI 2016)     | R376Q       | Missense | NA         | NA              | 1     |             |                                              |                     | N              |
| TCGA-AA-3864-01            | Colorectal (TCGA pub)      | R376Q       | Missense | Diploid    | NA              | 1     | 2           | Y (R: 0.99995881/Q: 0.00004119) ss1688394685 |                     | Y (0.00004133) |
| TCGA-AA-3864-01            | Colorectal (TCGA)          | R376Q       | Missense | Diploid    | NA              |       |             |                                              |                     | N              |
| TCGA-BR-8487-01            | Stomach (TCGA pub)         | L377P       | Missense | Diploid    | 0.23            | 1     | 1           |                                              |                     | N              |
| TCGA-BR-8487-01            | Stomach (TCGA)             | L377P       | Missense | Diploid    | NA              |       |             |                                              |                     | N              |
| HCT_116                    | NCI-60                     | L377V       | Missense | Diploid    | NA              | 1     | 1           |                                              |                     | N              |
| 587256                     | Colorectal (Genentech)     | F379S       | Missense | NA         | NA              | 1     | 1           |                                              |                     | N              |
| coadread_dfici_2016_578    | Colorectal (DFCI 2016)     | E383K       | Missense | NA         | NA              | 1     |             |                                              |                     | N              |
| TCGA-BR-8680-01            | Stomach (TCGA pub)         | E383K       | Missense | Diploid    | 0.27            | 1     | 3           | Y (E: 0.99984348/K: 0.00015651) ss1688394678 |                     | Y (0.0001567)  |
| TCGA-BR-8680-01            | Stomach (TCGA)             | E383K       | Missense | Diploid    | NA              | 1     |             |                                              |                     | N              |
| TCGA-SW-A7EA-01            | Stomach (TCGA)             | E383K       | Missense | Diploid    | NA              | 1     |             |                                              |                     | N              |
| 587222                     | Colorectal (Genentech)     | E385D       | Missense | NA         | NA              | 1     |             |                                              |                     | N              |
| TCGA-AP-A056-01            | Uterine (TCGA pub)         | E385D       | Missense | Diploid    | 0.33            | 1     | 2           |                                              |                     | N              |
| TCGA-AP-A056-01            | Uterine (TCGA)             | E385D       | Missense | Diploid    | 0.33            |       |             |                                              |                     | N              |
| TCGA-AA-A00A-01            | Colorectal (TCGA pub)      | I386N       | Missense | Diploid    | NA              | 1     | 1           |                                              |                     | N              |
| TCGA-AA-A00A-01            | Colorectal (TCGA)          | I386N       | Missense | Diploid    | NA              |       |             |                                              |                     | N              |
| TCGA-BR-4361-01            | Stomach (TCGA pub)         | X406_splice | Splice   | Diploid    | 0.24            | 1     | 1           |                                              |                     | N              |
| TCGA-BR-4361-01            | Stomach (TCGA)             | X406_splice | Splice   | Diploid    | NA              |       |             |                                              |                     | N              |
| TCGA-GN-A266-06            | Melanoma (TCGA)            | D408N       | Missense | Gain       | 0.5             | 1     | 1           |                                              |                     | N              |
| DLBCL_MAYO_DLBC_L_234      | DLBCL (Broad 2012)         | Q419E       | Missense | NA         | NA              | 1     | 1           |                                              |                     | N              |
| TCGA-AR-A0TX-01            | Breast (TCGA 2015)         | F433L       | Missense | Diploid    | 0.24            |       |             |                                              |                     | N              |
| TCGA-AR-A0TX-01            | Breast (TCGA pub)          | F433L       | Missense | Diploid    | NA              | 1     | 1           | Y (F: 0.99983525/L: 0.00016473) ss1688394636 |                     | Y (0.0001667)  |
| TCGA-AR-A0TX-01            | Breast (TCGA)              | F433L       | Missense | Diploid    | NA              |       |             |                                              |                     | N              |
| TCGA-JW-A5VL-01            | Cervical (TCGA)            | S434C       | Missense | Diploid    | NA              | 1     | 1           |                                              |                     | N              |
| TCGA-CN-A63V-01            | Head & neck (TCGA)         | S434P       | Missense | Diploid    | NA              | 1     | 1           |                                              |                     | N              |
| TCGA-B7-A5TN-01            | Stomach (TCGA)             | S435P       | Missense | Diploid    | NA              | 1     | 1           |                                              |                     | N              |
| TCGA-56-8307-01            | NSCLC (TCGA 2016)          | H437D       | Missense | Diploid    | 0.28            | 1     | 1           |                                              |                     | N              |
| TCGA-JW-A5VL-01            | Cervical (TCGA)            | H437Y       | Missense | Diploid    | NA              | 1     | 1           |                                              |                     | N              |
| S02348                     | Small Cell Lung (UCOLOGNE) | T440A       | Missense | NA         | NA              | 1     | 1           |                                              |                     | N              |
| TCGA-DU-8161-01            | Gloma (TCGA)               | F442V       | Missense | ShallowDel | 0.28            | 1     | 1           |                                              |                     | N              |
| TCGA-DU-8161-01            | GG-GBM (TCGA 2016)         | F442V       | Missense | ShallowDel | 0.28            |       |             |                                              |                     | N              |
| TCGA-IR-A3LK-01            | Cervical (TCGA)            | T447I       | Missense | Diploid    | NA              | 1     | 1           |                                              |                     | N              |
| 585208                     | Small Cell Lung (JHU)      | Q473*       | Nonsense | NA         | NA              | 1     | 1           |                                              |                     | N              |
| ESCC-210T                  | Esophagus sq (ICGC)        | T477A       | Missense | NA         | 0.21            | 1     | 1           |                                              |                     | N              |
| MEL-Ma-Mel-16              | Melanoma (Broad)           | L480I       | Missense | NA         | NA              | 1     | 1           |                                              |                     | N              |
| YUPAT                      | Melanoma (Yale)            | N494D       | Missense | NA         | NA              | 1     | 1           |                                              |                     | N              |
| TCGA-AG-A002-01            | Colorectal (TCGA pub)      | E502*       | Nonsense | Diploid    | NA              | 1     | 1           |                                              |                     | N              |
| TCGA-AG-A002-01            | Colorectal (TCGA)          | E502*       | Nonsense | Diploid    | NA              |       |             |                                              |                     | N              |
| TCGA-V4-A9F8-01            | Uveal melanoma (TCGA)      | I508T       | Missense | Diploid    | 0.41            | 1     | 1           |                                              |                     | N              |
| TCGA-34-8454-01            | NSCLC (TCGA 2016)          | E515Q       | Missense | Diploid    | 0.24            | 1     | 1           |                                              |                     | N              |

# Supplementary Figure 1

c

| STING<br>Mutation | Count      |        |      |
|-------------------|------------|--------|------|
|                   | cBioPortal | COSMIC | ICGC |
| S4C               | 1          |        |      |
| A18D              |            | 1      | 1    |
| P40S              |            | 2      |      |
| L49I              | 1          |        |      |
| H50Q              | 1          | 2      | 1    |
| S53F              |            | 1      |      |
| R71H              | 1          |        | 1    |
| H74Y              | 1          | 1      |      |
| R76G              |            | 1      |      |
| R78W              | 1          |        |      |
| W82R              | 1          | 1      | 1    |
| T84S              | 1          |        |      |
| V85Cfs*46         | 1          | 1      |      |
| G90C              | 1          |        |      |
| P92L              |            | 1      |      |
| R94C              | 1          | 1      | 1    |
| G96E              | 1          |        |      |
| V113L             | 1          |        |      |
| S127T             | 1          |        |      |
| N131fs*13         |            | 1      |      |
| L133F             | 1          | 1      | 1    |
| L136P             | 2          | 2      |      |
| W161*             | 1          |        |      |
| R169W             | 3          |        |      |
| R180Q             | 2          | 1      | 1    |
| N183S             |            | 1      |      |
| R191L             | 1          |        |      |
| R191Q             | 1          |        |      |
| R191W             | 1          |        |      |
| G192S             |            | 1      |      |
| R197Q             | 1          | 1      | 1    |
| R197W             |            | 1      |      |
| L202F             | 1          | 1      | 2    |
| P203S             | 2          |        |      |
| D205N             |            | 1      |      |
| D210N             | 1          | 1      | 1    |
| N218Tfs*129       | 1          |        | 1    |
| G230A             |            |        | 1    |
| H232Y             |            | 1      | 1    |
| A233S             | 1          |        |      |
| R238W             | 1          |        | 1    |
| G251E             |            | 1      |      |
| R253W             | 1          |        |      |
| R253Q             |            | 1      | 1    |
| T263I             | 1          |        |      |
| P264fs            |            |        | 1    |
| L265Cfs*82        | 2          |        |      |
| M271V             | 1          |        |      |
| Y274C             | 1          |        |      |
| Y274D             |            | 1      |      |
| Q276P             | 1          | 1      | 1    |
| R281L             | 1          |        |      |
| E282*             | 1          | 1      | 1    |
| R284M             | 1          |        |      |
| L285I             |            | 1      |      |
| L285P             |            | 1      |      |
| R293Q             |            |        | 1    |
| P303Lfs*44        | 1          |        |      |
| R310H             |            | 1      |      |
| A318T             | 1          |        |      |
| D319E             | 1          |        |      |
| V329F             | 1          | 1      | 1    |
| G344C             |            | 1      | 1    |
| G344D             |            | 2      | 1    |
| T356M             | 1          | 1      |      |
| LL363LF           |            |        | 1    |
| P371L             | 1          | 1      | 1    |
| R375C             | 1          | 3      | 2    |
| R375H             | 1          | 1      | 1    |
| T376K             | 1          | 1      | 1    |
| T376K             |            |        |      |
| F378L             |            |        | 1    |

| cGAS<br>Mutation | Count      |        |      |
|------------------|------------|--------|------|
|                  | cBioPortal | COSMIC | ICGC |
| G6R              | 1          | 1      | 1    |
| G16R             | 1          | 1      |      |
| A27T             |            |        | 1    |
| M32I             | 1          | 1      |      |
| A54Pfs*119       | 1          |        |      |
| K82T             | 1          |        |      |
| P85S             |            |        | 1    |
| T97S             |            |        | 1    |
| R122C            |            | 1      |      |
| G145R            | 2          | 1      | 1    |
| S149L            |            | 1      | 1    |
| V154I            | 1          |        |      |
| A159V            | 1          |        |      |
| R166Q            | 1          |        |      |
| A202T            |            | 1      |      |
| E216D            | 1          | 1      | 1    |
| H217Q            |            | 1      |      |
| E233D            |            | 1      |      |
| V234A            | 1          | 1      |      |
| E240Q            |            |        | 1    |
| E241K            | 1          |        |      |
| S243T            | 1          | 1      | 1    |
| R246C            | 1          |        |      |
| Y248*            | 1          | 1      | 1    |
| P257S            | 2          | 2      | 2    |
| E259K            |            | 1      |      |
| E259*            | 1          | 1      | 1    |
| R281K            |            | 1      |      |
| D295Y            |            | 1      | 1    |
| G303E            | 1          |        |      |
| I316L            |            | 1      |      |
| V318L            | 1          |        |      |
| D319Y            |            | 1      |      |
| S326L            | 1          | 1      | 1    |
| W330C            | 1          |        |      |
| W330R            | 1          |        |      |
| S333I            | 1          | 1      |      |
| R339H            | 5          | 4      | 3    |
| Q341*            |            | 2      | 1    |
| N342H            | 1          | 1      | 1    |
| W343*            | 1          | 1      | 1    |
| W343C            | 1          |        |      |
| S345*            | 1          | 1      | 1    |
| S345L            | 1          |        |      |
| V360E            |            | 1      |      |
| N368H            | 1          |        |      |
| R376L            | 1          |        |      |
| R376Q            | 2          |        |      |
| L377P            | 1          | 1      | 1    |
| L377V            | 1          |        |      |
| F379S            | 1          | 1      |      |
| I382T            |            | 1      | 1    |
| E383K            | 3          | 2      | 1    |
| E385K            |            | 1      |      |
| E385D            | 2          | 2      | 1    |
| I386N            | 1          |        |      |
| C396G            |            |        | 1    |
| N399fs*22        |            | 1      |      |
| E401*            |            | 1      | 1    |
| E402D            |            | 1      | 1    |
| D408N            | 1          | 1      | 1    |
| Q419E            | 1          |        |      |
| K428fs           |            |        | 1    |
| F433L            | 1          | 1      | 1    |
| S434C            | 1          | 1      | 1    |
| S434P            | 2          |        |      |
| H437Y            | 1          | 1      | 1    |
| H437D            | 1          |        |      |
| T440A            | 1          | 1      |      |
| F442V            | 2          | 1      | 1    |
| H444L            |            | 1      | 1    |
| V445I            |            | 1      |      |
| T447I            | 1          | 1      | 1    |
| P450R            |            | 1      |      |
| Q473*            | 1          | 1      |      |
| T477A            | 1          | 1      | 1    |
| L480I            | 1          |        |      |
| P486L            |            | 1      |      |
| N494D            | 1          | 1      |      |
| R499I            |            | 2      | 2    |
| E502*            | 1          | 1      |      |
| I508T            | 1          |        |      |
| E515Q            | 1          |        |      |

# Supplementary Figure 1

d

| STING<br>(TMEM173)<br>R191W | Population             | Allele Count | Allele Number | Number of Homozygotes | Allele Frequency |
|-----------------------------|------------------------|--------------|---------------|-----------------------|------------------|
|                             | Latino                 | 3            | 11578         | 0                     | 0.000259112      |
|                             | African                | 5            | 10406         | 0                     | 0.000480492      |
|                             | European (Finnish)     | 16           | 6614          | 0                     | 0.002419111      |
|                             | European (Non-Finnish) | 22           | 66728         | 0                     | 0.000329697      |
|                             | East Asian             | 0            | 8654          | 0                     | 0                |
|                             | South Asian            | 0            | 16512         | 0                     | 0                |
|                             | Other                  | 1            | 908           | 0                     | 0.001101322      |
|                             | Total                  | 47           | 121400        | 0                     | 0.00038715       |

| STING<br>(TMEM173)<br>R253W | Population             | Allele Count | Allele Number | Number of Homozygotes | Allele Frequency |
|-----------------------------|------------------------|--------------|---------------|-----------------------|------------------|
|                             | Latino                 | 5            | 11560         | 0                     | 0.000432526      |
|                             | African                | 2            | 10270         | 0                     | 0.000194742      |
|                             | European (Finnish)     | 0            | 6612          | 0                     | 0                |
|                             | European (Non-Finnish) | 5            | 66174         | 0                     | 7.55584E-05      |
|                             | East Asian             | 0            | 8622          | 0                     | 0                |
|                             | South Asian            | 0            | 15148         | 0                     | 0                |
|                             | Other                  | 0            | 882           | 0                     | 0                |
|                             | Total                  | 12           | 119268        | 0                     | 0.000100614      |

| cGAS<br>(MB21D1)<br>R339H | Population             | Allele Count | Allele Number | Number of Homozygotes | Allele Frequency |
|---------------------------|------------------------|--------------|---------------|-----------------------|------------------|
|                           | Latino                 | 2            | 11576         | 0                     | 0.000172771      |
|                           | African                | 1            | 10390         | 0                     | 9.62464E-05      |
|                           | European (Finnish)     | 0            | 6614          | 0                     | 0                |
|                           | European (Non-Finnish) | 0            | 66728         | 0                     | 0                |
|                           | East Asian             | 0            | 8654          | 0                     | 0                |
|                           | South Asian            | 0            | 16512         | 0                     | 0                |
|                           | Other                  | 0            | 908           | 0                     | 0                |
|                           | Total                  | 3            | 121382        | 0                     | 2.47154E-05      |

| cGAS<br>(MB21D1)<br>R376Q | Population             | Allele Count | Allele Number | Number of Homozygotes | Allele Frequency |
|---------------------------|------------------------|--------------|---------------|-----------------------|------------------|
|                           | Latino                 | 0            | 11552         | 0                     | 0                |
|                           | African                | 0            | 10364         | 0                     | 0                |
|                           | European (Finnish)     | 0            | 6610          | 0                     | 0                |
|                           | European (Non-Finnish) | 4            | 66446         | 0                     | 6.01993E-05      |
|                           | East Asian             | 1            | 8630          | 0                     | 0.000115875      |
|                           | South Asian            | 0            | 16464         | 0                     | 0                |
|                           | Other                  | 0            | 906           | 0                     | 0                |
|                           | Total                  | 5            | 120972        | 0                     | 4.13319E-05      |

| cGAS<br>(MB21D1)<br>E383K | Population             | Allele Count | Allele Number | Number of Homozygotes | Allele Frequency |
|---------------------------|------------------------|--------------|---------------|-----------------------|------------------|
|                           | Latino                 | 4            | 11570         | 0                     | 0.000345722      |
|                           | African                | 1            | 10394         | 0                     | 9.62094E-05      |
|                           | European (Finnish)     | 0            | 6614          | 0                     | 0                |
|                           | European (Non-Finnish) | 14           | 66622         | 0                     | 0.000210141      |
|                           | East Asian             | 0            | 8646          | 0                     | 0                |
|                           | South Asian            | 0            | 16494         | 0                     | 0                |
|                           | Other                  | 0            | 906           | 0                     | 0                |
|                           | Total                  | 19           | 121246        | 0                     | 0.000156706      |

# Supplementary Figure 1

e

| Tissue                                                           | Cell line                                                        | Expression                                                  |                | Response to dsDNA | Reference                                                                                                                                                                                                              |
|------------------------------------------------------------------|------------------------------------------------------------------|-------------------------------------------------------------|----------------|-------------------|------------------------------------------------------------------------------------------------------------------------------------------------------------------------------------------------------------------------|
|                                                                  |                                                                  | STING                                                       | cGAS           |                   |                                                                                                                                                                                                                        |
| Breast                                                           | MCF-10A (non-tumorigenic epithelial cells)                       | Yes                                                         | Not tested     | Not tested        | Bhatellia et al., <i>Biochim. Biophys. Acta</i> , 1842 (2014), 144-53.                                                                                                                                                 |
|                                                                  | MCF-7                                                            | No                                                          | Not tested     | Not tested        |                                                                                                                                                                                                                        |
|                                                                  | T47-D                                                            | No                                                          | Not tested     | Not tested        |                                                                                                                                                                                                                        |
|                                                                  | HBL-100                                                          | Yes                                                         | Not tested     | Not tested        |                                                                                                                                                                                                                        |
|                                                                  | MDA-MB-231                                                       | Yes                                                         | Not tested     | Not tested        |                                                                                                                                                                                                                        |
|                                                                  | ZR-75-1                                                          | Yes                                                         | Not tested     | Not tested        |                                                                                                                                                                                                                        |
|                                                                  | MDA231                                                           | Very weak                                                   | Not tested     | No                |                                                                                                                                                                                                                        |
|                                                                  | HeLa                                                             | Very weak                                                   | Not tested     | No                |                                                                                                                                                                                                                        |
|                                                                  | HEK293T                                                          | No                                                          | No             | No                |                                                                                                                                                                                                                        |
|                                                                  | HEK293                                                           | Yes                                                         | Not tested     | Yes               |                                                                                                                                                                                                                        |
| Large intestine                                                  | FHC (normal colon epithelial cells)                              | Yes                                                         | No (mRNA: Yes) | Yes               | Xia et al., <i>Cell Reports</i> , 14 (2016), 282-97.<br>Xia et al., <i>Cell Reports</i> , 14 (2016), 282-97.<br>Sun et al., <i>Science</i> , 339 (2013), 786-91.<br>Zhong et al., <i>Immunity</i> , 29 (2009), 538-50. |
|                                                                  | SW1116                                                           | Yes                                                         | Yes            | Yes               |                                                                                                                                                                                                                        |
|                                                                  | LS123                                                            | Yes                                                         | Yes            | Yes               |                                                                                                                                                                                                                        |
|                                                                  | LS174T                                                           | Yes                                                         | No             | No                |                                                                                                                                                                                                                        |
|                                                                  | SW480                                                            | Yes                                                         | No             | No                |                                                                                                                                                                                                                        |
|                                                                  | SW948                                                            | Yes                                                         | Yes            | No                |                                                                                                                                                                                                                        |
|                                                                  | SW1417                                                           | Yes                                                         | No             | Yes               |                                                                                                                                                                                                                        |
|                                                                  | LOVO                                                             | Yes                                                         | Yes            | Yes               |                                                                                                                                                                                                                        |
|                                                                  | SW48                                                             | No                                                          | No             | No                |                                                                                                                                                                                                                        |
|                                                                  | HT29                                                             | Yes                                                         | Yes            | Yes               |                                                                                                                                                                                                                        |
|                                                                  | HT116                                                            | Yes                                                         | No             | No                |                                                                                                                                                                                                                        |
|                                                                  | COLO205                                                          | Yes                                                         | No             | No                |                                                                                                                                                                                                                        |
|                                                                  | THP1                                                             | Yes                                                         | Yes            | Yes               |                                                                                                                                                                                                                        |
|                                                                  | Huh7                                                             | No                                                          | Not tested     | Not tested        |                                                                                                                                                                                                                        |
|                                                                  | Leukocyte                                                        | PASMC (normal primary pulmonary artery smooth muscle cells) | Not tested     | Not tested        |                                                                                                                                                                                                                        |
| H1299                                                            |                                                                  | Very weak                                                   | Not tested     | Yes               | Zhong et al., <i>Immunity</i> , 29 (2009), 538-50.                                                                                                                                                                     |
| A549                                                             |                                                                  | Yes                                                         | Not tested     | No                | Xia et al., <i>Cell Reports</i> , 14 (2016), 282-97.                                                                                                                                                                   |
| Lung                                                             | SK-OV-3                                                          | Yes                                                         | Not tested     | Not tested        | Zhong et al., <i>Immunity</i> , 29 (2009), 538-50.                                                                                                                                                                     |
|                                                                  | OVCAR3                                                           | Very weak                                                   | Not tested     | No                |                                                                                                                                                                                                                        |
|                                                                  | H1299                                                            | Yes                                                         | Not tested     | No                |                                                                                                                                                                                                                        |
| Ovary                                                            | INTERT-B.11 (telomerase-immortalized human foreskin fibroblasts) | Yes                                                         | Yes            | Yes               | Xia et al., <i>Cell Reports</i> , 14 (2016), 282-97.                                                                                                                                                                   |
|                                                                  | NHDF-Ad (normal human dermal fibroblasts)                        | Not tested                                                  | Not tested     | Yes               |                                                                                                                                                                                                                        |
|                                                                  | HEMa (normal human epidermal melanocytes)                        | Yes                                                         | Yes            | Yes               |                                                                                                                                                                                                                        |
|                                                                  | A375                                                             | Yes                                                         | No             | No                |                                                                                                                                                                                                                        |
|                                                                  | G361                                                             | No                                                          | No             | No                |                                                                                                                                                                                                                        |
|                                                                  | MeWo                                                             | No                                                          | Yes            | No                |                                                                                                                                                                                                                        |
|                                                                  | RPM17951                                                         | Yes                                                         | Yes            | No (WB: Yes)      |                                                                                                                                                                                                                        |
|                                                                  | SK-MEL-2                                                         | Yes                                                         | Yes            | No                |                                                                                                                                                                                                                        |
|                                                                  | SK-MEL-3                                                         | Yes                                                         | Yes            | No (WB: Yes)      |                                                                                                                                                                                                                        |
|                                                                  | SK-MEL-5                                                         | No                                                          | No             | No                |                                                                                                                                                                                                                        |
|                                                                  | SK-MEL-24                                                        | Yes                                                         | No (mRNA: Yes) | Yes               |                                                                                                                                                                                                                        |
|                                                                  | SK-MEL-28                                                        | Yes                                                         | Yes            | No                |                                                                                                                                                                                                                        |
|                                                                  | SK-MEL-31                                                        | Yes                                                         | Yes            | Yes               |                                                                                                                                                                                                                        |
|                                                                  | WMI15                                                            | Yes                                                         | Yes            | No                |                                                                                                                                                                                                                        |
|                                                                  | Skin                                                             | MCF-10A (non-tumorigenic epithelial cells)                  | Yes            | Not tested        |                                                                                                                                                                                                                        |
| MCF-7                                                            |                                                                  | No                                                          | Not tested     | Not tested        |                                                                                                                                                                                                                        |
| T47-D                                                            |                                                                  | No                                                          | Not tested     | Not tested        |                                                                                                                                                                                                                        |
| HBL-100                                                          |                                                                  | Yes                                                         | Not tested     | Not tested        |                                                                                                                                                                                                                        |
| MDA-MB-231                                                       |                                                                  | Yes                                                         | Not tested     | Not tested        |                                                                                                                                                                                                                        |
| ZR-75-1                                                          |                                                                  | Yes                                                         | Not tested     | Not tested        |                                                                                                                                                                                                                        |
| MDA231                                                           |                                                                  | Very weak                                                   | Not tested     | No                |                                                                                                                                                                                                                        |
| HeLa                                                             |                                                                  | Very weak                                                   | Not tested     | No                |                                                                                                                                                                                                                        |
| HEK293T                                                          |                                                                  | No                                                          | No             | No                |                                                                                                                                                                                                                        |
| HEK293                                                           |                                                                  | Yes                                                         | Not tested     | Yes               |                                                                                                                                                                                                                        |
| FHC (normal colon epithelial cells)                              |                                                                  | Yes                                                         | No (mRNA: Yes) | Yes               |                                                                                                                                                                                                                        |
| SW1116                                                           |                                                                  | Yes                                                         | Yes            | Yes               |                                                                                                                                                                                                                        |
| LS123                                                            |                                                                  | Yes                                                         | Yes            | Yes               |                                                                                                                                                                                                                        |
| LS174T                                                           |                                                                  | Yes                                                         | No             | No                |                                                                                                                                                                                                                        |
| SW480                                                            |                                                                  | Yes                                                         | No             | No                |                                                                                                                                                                                                                        |
| SW948                                                            | Yes                                                              | Yes                                                         | No             |                   |                                                                                                                                                                                                                        |
| SW1417                                                           | Yes                                                              | No                                                          | Yes            |                   |                                                                                                                                                                                                                        |
| LOVO                                                             | Yes                                                              | Yes                                                         | Yes            |                   |                                                                                                                                                                                                                        |
| SW48                                                             | No                                                               | No                                                          | No             |                   |                                                                                                                                                                                                                        |
| HT29                                                             | Yes                                                              | Yes                                                         | Yes            |                   |                                                                                                                                                                                                                        |
| HT116                                                            | Yes                                                              | No                                                          | No             |                   |                                                                                                                                                                                                                        |
| COLO205                                                          | Yes                                                              | No                                                          | No             |                   |                                                                                                                                                                                                                        |
| THP1                                                             | Yes                                                              | Yes                                                         | Yes            |                   |                                                                                                                                                                                                                        |
| Huh7                                                             | No                                                               | Not tested                                                  | Not tested     |                   |                                                                                                                                                                                                                        |
| PASMC (normal primary pulmonary artery smooth muscle cells)      | Not tested                                                       | Not tested                                                  | Yes            |                   |                                                                                                                                                                                                                        |
| H1299                                                            | Very weak                                                        | Not tested                                                  | Yes            |                   |                                                                                                                                                                                                                        |
| A549                                                             | Yes                                                              | Not tested                                                  | No             |                   |                                                                                                                                                                                                                        |
| SK-OV-3                                                          | Yes                                                              | Not tested                                                  | Not tested     |                   |                                                                                                                                                                                                                        |
| OVCAR3                                                           | Very weak                                                        | Not tested                                                  | No             |                   |                                                                                                                                                                                                                        |
| INTERT-B.11 (telomerase-immortalized human foreskin fibroblasts) | Yes                                                              | Yes                                                         | Yes            |                   |                                                                                                                                                                                                                        |
| NHDF-Ad (normal human dermal fibroblasts)                        | Not tested                                                       | Not tested                                                  | Yes            |                   |                                                                                                                                                                                                                        |
| HEMa (normal human epidermal melanocytes)                        | Yes                                                              | Yes                                                         | Yes            |                   |                                                                                                                                                                                                                        |
| A375                                                             | Yes                                                              | No                                                          | No             |                   |                                                                                                                                                                                                                        |
| G361                                                             | No                                                               | No                                                          | No             |                   |                                                                                                                                                                                                                        |
| MeWo                                                             | No                                                               | Yes                                                         | No             |                   |                                                                                                                                                                                                                        |
| RPM17951                                                         | Yes                                                              | Yes                                                         | No (WB: Yes)   |                   |                                                                                                                                                                                                                        |
| SK-MEL-2                                                         | Yes                                                              | Yes                                                         | No             |                   |                                                                                                                                                                                                                        |
| SK-MEL-3                                                         | Yes                                                              | Yes                                                         | No (WB: Yes)   |                   |                                                                                                                                                                                                                        |
| SK-MEL-5                                                         | No                                                               | No                                                          | No             |                   |                                                                                                                                                                                                                        |
| SK-MEL-24                                                        | Yes                                                              | No (mRNA: Yes)                                              | Yes            |                   |                                                                                                                                                                                                                        |
| SK-MEL-28                                                        | Yes                                                              | Yes                                                         | No             |                   |                                                                                                                                                                                                                        |
| SK-MEL-31                                                        | Yes                                                              | Yes                                                         | Yes            |                   |                                                                                                                                                                                                                        |
| WMI15                                                            | Yes                                                              | Yes                                                         | No             |                   |                                                                                                                                                                                                                        |



## Supplementary Figure 2

Human STING (TMEM173) crystal structure in complex with cGAMP

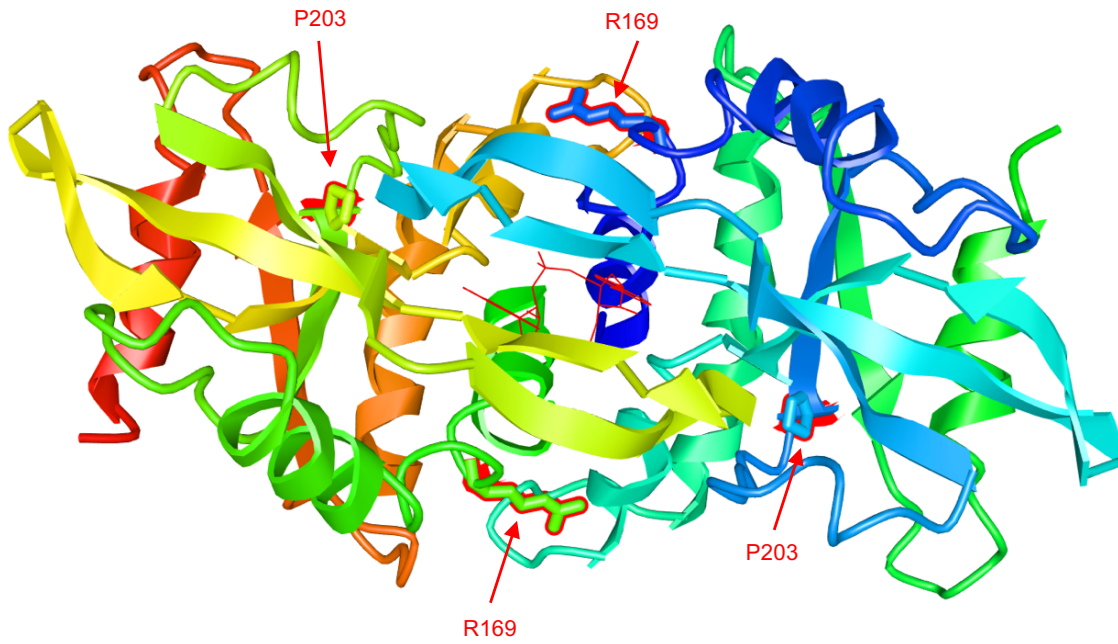

# Supplementary Figure 3

**a**

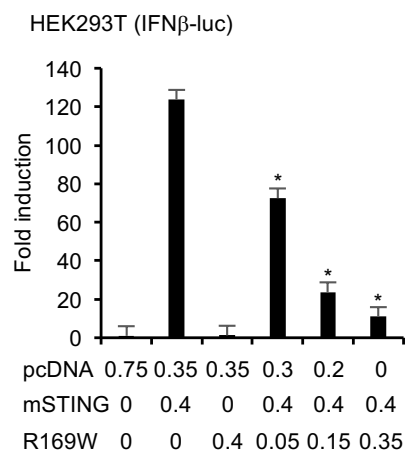

**b**

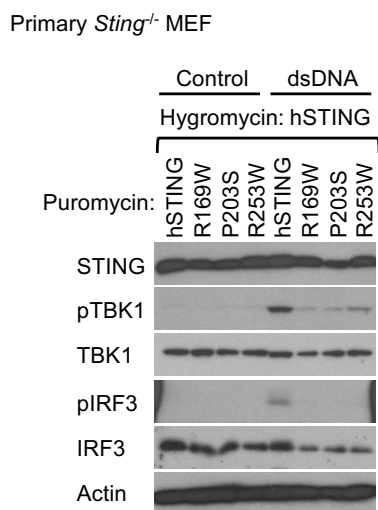



# Supplementary Figure 5

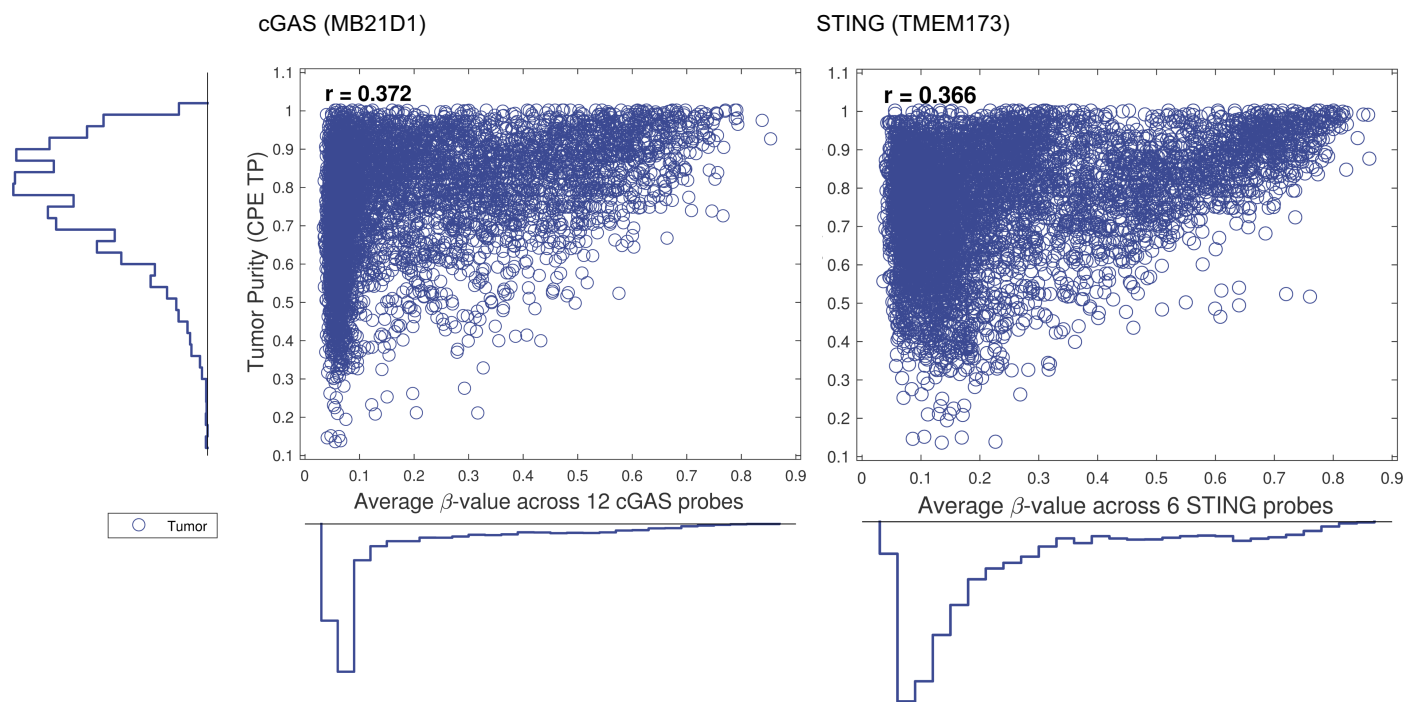

# Supplementary Figure 6

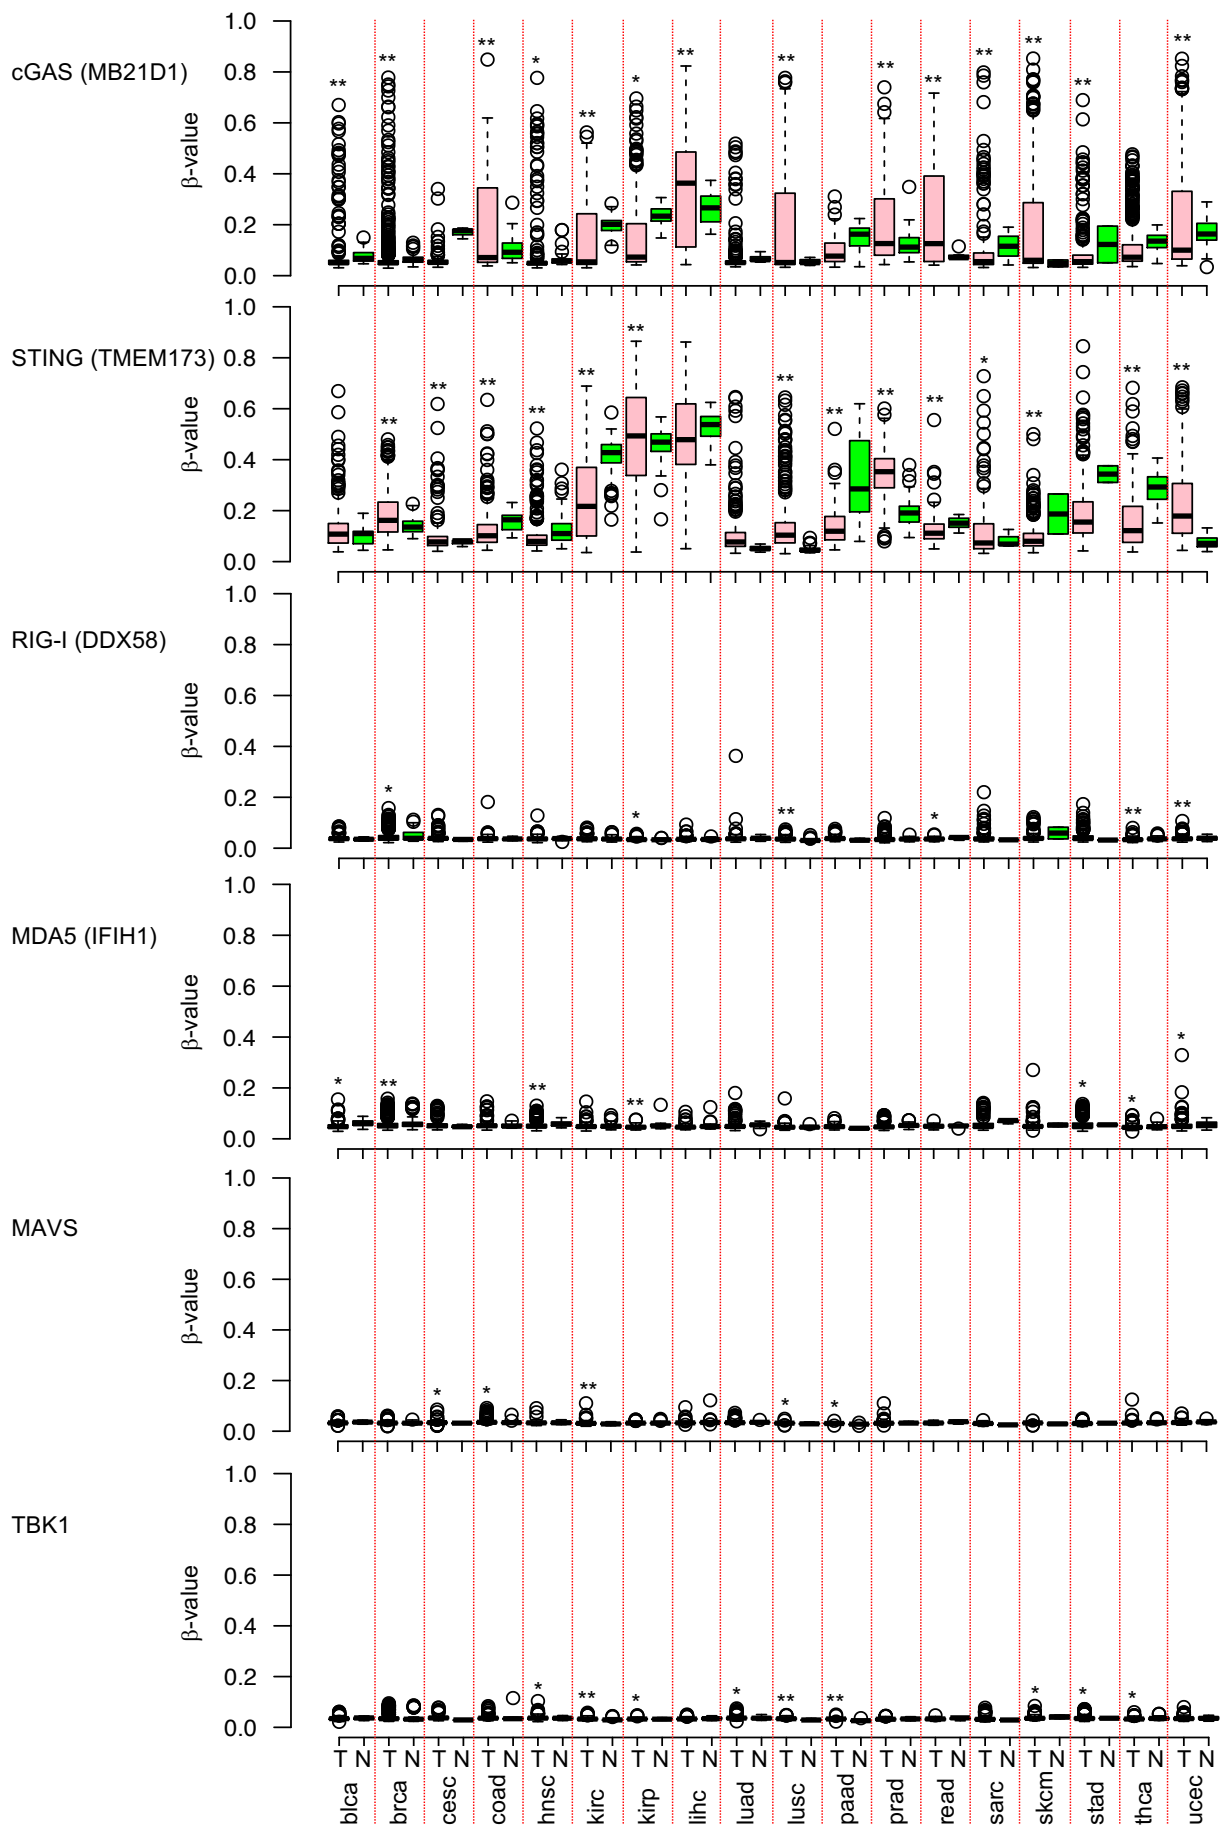

## Abbreviation

|      |                                                                  |
|------|------------------------------------------------------------------|
| ACC  | Adrenocortical carcinoma                                         |
| BLCA | Bladder Urothelial Carcinoma                                     |
| BRCA | Breast invasive carcinoma                                        |
| CESC | Cervical squamous cell carcinoma and endocervical adenocarcinoma |
| CHOL | Cholangiocarcinoma                                               |
| COAD | Colon adenocarcinoma                                             |
| DLBC | Lymphoid Neoplasm Diffuse Large B-cell Lymphoma                  |
| ESCA | Esophageal carcinoma                                             |
| GBM  | Glioblastoma multiforme                                          |
| HNSC | Head and Neck squamous cell carcinoma                            |
| KICH | Kidney Chromophobe                                               |
| KIRC | Kidney renal clear cell carcinoma                                |
| KIRP | Kidney renal papillary cell carcinoma                            |
| LGG  | Brain Lower Grade Glioma                                         |
| LIHC | Liver hepatocellular carcinoma                                   |
| LUAD | Lung adenocarcinoma                                              |
| LUSC | Lung squamous cell carcinoma                                     |
| MESO | Mesothelioma                                                     |
| OV   | Ovarian serous cystadenocarcinoma                                |
| PAAD | Pancreatic adenocarcinoma                                        |
| PCPG | Pheochromocytoma and Paraganglioma                               |
| PRAD | Prostate adenocarcinoma                                          |
| READ | Rectum adenocarcinoma                                            |
| SARC | Sarcoma                                                          |
| SKCM | Skin Cutaneous Melanoma                                          |
| STAD | Stomach adenocarcinoma                                           |
| TGCT | Testicular Germ Cell Tumors                                      |
| THCA | Thyroid carcinoma                                                |
| THYM | Thymoma                                                          |
| UCEC | Uterine Corpus Endometrial Carcinoma                             |
| UCS  | Uterine Carcinosarcoma                                           |
| UVM  | Uveal Melanoma                                                   |

## Primers used in this study

### hSTING mutation

|           |                                    |
|-----------|------------------------------------|
| R169W-Fwd | TACATCGGATATCTGTGGCTGATCCTGCCAGAG  |
| R169W-Rev | CTCTGGCAGGATCAGCCACAGATATCCGATGTA  |
| R180Q-Fwd | CTCCAGGCCCGGATTCAAACCTTACAATCAGCAT |
| R180Q-Rev | ATGCTGATTGTAAGTTTGAATCCGGGCCTGGAG  |
| R191W-Fwd | TACAACAACCTGCTATGGGGTGCAGTGAGCCAG  |
| R191W-Rev | CTGGCTCACTGCACCCCATAGCAGGTTGTTGTA  |
| P203S-Fwd | CTGTATATTCTCCTCTCATTGGACTGTGGGGTG  |
| P203S-Rev | CACCCACAGTCCAATGAGAGGAGAATATACAG   |
| R238W-Fwd | GCTGGCATCAAGGATTGGGTTTACAGCAACAGC  |
| R238W-Rev | GCTGTTGCTGTAAACCCAATCCTTGATGCCAGC  |
| R253W-Fwd | CTGGAGAACGGGCAGTGGGCGGGCACCTGTGTC  |
| R253W-Rev | GACACAGGTGCCCGCCCACTGCCCGTTCTCCAG  |

### hcGAS mutation

|           |                                               |
|-----------|-----------------------------------------------|
| G145R-Fwd | GACGTGCCCAGCCCCCGCTGCCGGTCTCGG                |
| G145R-Rev | CCGAGACCGGCAGCGGGGGCTGGGCACGTC                |
| P257S-Fwd | CTTTGTGAAATTTAAAAGAAATTCGAAAGAAAATCATCTGAGTC  |
| P257S-Rev | GACTCAGATGATTTTCTTTTCAATTTCTTTTAAATTTACAAAAG  |
| W330R-Fwd | GAATCAAAAAGTAGCCGGCCTGCTAGCACCC               |
| W330R-Rev | GGGTGCTAGCAGGCCGGCTACTTTTTGATTC               |
| R339H-Fwd | CCCAAGAAGGCCTGCACATTCAAACCTGGCT               |
| R339H-Rev | AGCCAGTTTTGAATGTGCAGGCCTTCTTGGG               |
| R376Q-Fwd | AAGAAGAAACATGGCAGCTATCCTTCTCTCA               |
| R376Q-Rev | TGAGAGAAGGATAGCTGCCATGTTTCTTCTT               |
| L377P-Fwd | AAGAAACATGGCGGCCATCCTTCTCTCACAT               |
| L377P-Rev | ATGTGAGAGAAGGATGGCCGCCATGTTTCTT               |
| E383K-Fwd | TCCTTCTCTCACATCAAAAAGGAAATTTTGA               |
| E383K-Rev | TCAAAATTTCTTTTTGATGTGAGAGAAGGA                |
| E385D-Fwd | TCACATCGAAAAGGATATTTTGAACAATCAT               |
| E385D-Rev | ATGATTGTTCAAATATCCTTTTTCGATGTGA               |
| S434C-Fwd | CATCTGGATAAATTCTGTTCTTATCATGTGAAAACCTG        |
| S434C-Rev | CAGTTTTACATGATAAGAACAGAATTTATCCAGATG          |
| H437D-Fwd | AAATTCTTCTTATGATGTGAAAACCTGCCT                |
| H437D-Rev | AGGCAGTTTTCACATCATAAGAAGAGAATTT               |
| R499I-Fwd | CTAGCAACTTAATTGACAAAATAAGTAAAGAATTTCTGACAAAGC |
| R499I-Rev | GCTTTGTCAGAAATTCCTTACTTATTTTGTCAATTAAGTTGCTAG |

### hcGAS cloning

|           |                                                                    |
|-----------|--------------------------------------------------------------------|
| hcGAS-Fwd | GTTAGATCTATGCAGCCTTGGCACGGAAAGGCCATGC                              |
| hcGAS-Rev | GAGTCGACTTACTTGTTCATCGTCGTCTTGTAGTCAAATTCATCAAAAACCTGGAAAACCTCATTG |
